# Supplementary material for: Modeling Indoor Inorganic Aerosol Concentrations During the ATHLETIC Campaign with IMAGES
Source: PubMed Central journal article supplement (PMC11406535; doi:10.1021/acsestair.4c00060), 2024-09-03
Supplement: ea4c00060_si_001.pdf [file ea4c00060_si_001.pdf]

1 **Supplemental Information for:**

2

3 **Modeling Indoor Inorganic Aerosol Concentrations during the ATHLETIC Campaign with**  
4 **IMAGES**

5

6 Bryan Berman<sup>1</sup>, Bryan Cummings<sup>1</sup>, Hongyu Guo<sup>2</sup>, Pedro Campuzano-Jost<sup>2</sup>, Jose Jimenez<sup>2</sup>, Demetrios  
7 Pagonis<sup>3</sup>, Douglas Day<sup>2</sup>, Zachary Finewax<sup>2</sup>, Anne Handschy<sup>2</sup>, Benjamin A. Nault<sup>4</sup>, Peter DeCarlo<sup>5</sup>,  
8 Shannon Capps<sup>1</sup>, Michael Waring<sup>1,\*</sup>

9

10 <sup>1</sup>Department of Civil, Architectural and Environmental Engineering, Drexel University, Philadelphia, PA,  
11 19104

12 <sup>2</sup>Department of Chemistry and Cooperative Institute for Research in Environmental Sciences (CIRES),  
13 University of Colorado at Boulder, Boulder, CO 80309, USA

14 <sup>3</sup>Department of Chemistry and Biochemistry, Weber State University, Ogden, UT 84408, USA

15 <sup>4</sup>Center for Aerosol and Cloud Chemistry, Aerodyne Research, Inc., Billerica, MA, 01821, USA

16 <sup>5</sup>Department of Environmental Health and Engineering, Johns Hopkins University, Baltimore, MD  
17 21218, USA

18

19 *\*Corresponding author email: [maw59@drexel.edu](mailto:maw59@drexel.edu)*

20 **Table of Contents**

21 ***S1. Note on preprocessing ATHLETIC Campaign data .....3***

22 ***S2. ISORROPIA's performance indoors .....3***

23 ***S3. Optimizing indoor environmental conditions.....15***

24 ***S4. Relating emissions and deposition rates to  $\Delta\text{CO}_2$ .....18***

25 ***S5. IMAGES evaluation .....24***

26

27

## 28 **S1. Note on preprocessing ATHLETIC Campaign data**

29 During the ATHLETIC campaign, instruments switched between sampling the room and supply  
30 air every 5-10 minutes via an automated valve system.<sup>1,2</sup> However, IMAGES requires continuous inputs  
31 over consistent timesteps. Therefore, all measured data (such as room and supply duct concentrations,  
32 RH, supply  $T$ , and occupancy) were linearly interpolated over 5-min intervals before being used as inputs  
33 to IMAGES.  $\text{NH}_3$  and  $\text{HNO}_3$  were measured less frequently in the duct due to sampling concerns. Thus,  
34 three input datasets for the IMAGES framework were created and run separately. These datasets'  
35 date/time stamps are as follows: 1) Nov. 7 00:33 – Nov. 10 02:53, 2) Nov. 10 15:48 – Nov. 12 09:28, and  
36 Nov. 15 14:48 – Nov. 19 11:33.

37

38

## 39 **S2. ISORROPIA's performance indoors**

40 As discussed in Section 2.2, a parametric test was performed to determine the specific  $T$  and RH  
41 combinations that produce the necessary thermodynamic conditions within ISORROPIA to obtain  
42 reasonable agreement with measurements. Specifically, the parameters  $T$  and RH were varied from 260 to  
43 300 K at intervals of 1 K and 1 to 100% at intervals of 1%, respectively. This parametric test was done to  
44 determine if certain  $T$  and RH combinations yielded ISORROPIA-partitioned concentrations to be in  
45 better agreement with ATHLETIC study measurements (Figure S1). Then, the coefficient of  
46 determination ( $R^2$ ), slope ( $m$ ), and  $y$ -intercept ( $b$ ) of the measured and ISORROPIA partitioning fraction  
47 in the weight room,  $\varepsilon_{i,\text{room}}$ , were compared for each  $T$  and RH combination using an orthogonal  
48 regression since there is uncertainty in both modeled and measured data (Figure S1). Figure S1 shows  
49 heatmaps of the coefficient of determination ( $R^2$ ) (a, b), slope ( $m$ ) (c, d), and  $y$ -intercept ( $b$ ) (c, d) from  
50 the lines of best fit of ISORROPIA's predicted  $\varepsilon_{i,\text{room}}$  vs. the measured  $\varepsilon_{i,\text{room}}$ . The areas of best  
51 performance are highlighted by the lightest color in the heatmaps shown in Figure S1. Although it  
52 remains unclear why agreement improves under these specific environmental conditions, hysteresis and

53 inlet losses of  $\text{HNO}_3$  during measurements were hypothesized to be potential pieces to the puzzle and  
54 explored.

55 We first explored the hypothesis that not accounting for hysteresis effects contributes to  
56 ISORROPIA not agreeing with measurements. Figure S2 shows a time series of the different  
57 temperatures measured at various parts of the HVAC system and the fraction of outdoor air that enters the  
58 mixing box during the ATHLETIC campaign. The similar mixed  $T$  ( $T_{\text{mixed}}$ ), discharge  $T$  ( $T_{\text{discharge}}$ ), and  
59 supply duct  $T$  ( $T_{\text{supply}}$ ) suggests there was at most slight heating (and no cooling). Instead, the outdoor  $T$   
60 closely following the outdoor air fraction implies economizing was done to achieve a fairly constant  
61  $T_{\text{mixed}}$ , and the target  $T_{\text{discharge}}$  of  $\sim 287\text{-}288$  K at this main air handling unit (AHU). Prior to the air  
62 delivery back to the weight room, the air passes through local variable air volume (VAV) terminal boxes  
63 that can provide additional conditioning where likely some heating occurred at times (and/or in transit  
64 within ducts). To our knowledge, no humidification processes occurred in the HVAC. Nevertheless, it  
65 was thought that particles may have retained their aqueous phase as they were brought indoors. However,  
66 since the outdoor RH ( $\text{RH}_{\text{out}}$ ) is not consistently high, this theory was rejected (Figure S2). Still, an  
67 unaccounted-for condensation sink may have been present.<sup>3</sup> Inputting  $\text{RH}_{\text{room, meas}}$  to ISORROPIA  
68 results in the nitrate being simulated as a gas rather than a particle most of the time (Figure S3). Lowering  
69 the room  $T$  or increasing the RH seems to make up for the unaccounted-for condensation sink, despite us  
70 not being unable to identify it. Additionally, using ISORROPIA's stable mode, which allows particles to  
71 be aqueous or solids, showed no improvement and resulted in a worse agreement (Figures S4 and S5)  
72 than when run with the metastable mode.

73 The second hypothesis for why ISORROPIA's predicted  $\varepsilon_{i,\text{room}}$  disagreed with measurements  
74 was because of the complexities associated with measuring sticky gases such as  $\text{HNO}_3$ . ISORROPIA was  
75 run (and  $\varepsilon_{i,\text{room}}$  was calculated) with an increased amount of  $\text{HNO}_3$  added to the original measured value  
76 (up to ten times as much) to make up for the potential  $\text{HNO}_3$  loss. However, Figures S6 and S7 show that  
77 no improvements are made when  $\text{HNO}_3$  is increased; thus, this hypothesis was rejected.

78 In Figure S8, the OA ALW was found using  $\kappa$ OA parameterization from Rickards *et al.* Figure  
79 S8 shows that OA ALW is on the order of about 0.05 - 0.1  $\mu\text{g sm}^{-3}$ . Based on the total inorganic mass  
80 and their  $\kappa$  ( $\sim$  3-6x larger than kappa OA), the increase in IA ALW (caused by adjusting the RH upwards)  
81 is on the order of 5-15  $\mu\text{g sm}^{-3}$ . Therefore, not accounting for OA (in this data set) has no impact on the  
82 total ALW needed to explain the observations.

83 Despite generally having poor modeled vs. measured agreement, some instances exist where  $\text{NO}_3^-$   
84 and  $\text{NH}_4^+$  are in good agreement. Figures S9 and S10 show one-to-one plots of measured vs. ISORROPIA  
85 simulated  $\text{NO}_3^-$  and  $\text{NH}_4^+$  with  $\text{RH}_{\text{room,meas}}$  and are colored by pH. When the concentrations are in good  
86 agreement, the pH, an output of ISORROPIA, is unrealistically high, with some values reaching  $\sim$ 15. This  
87 result shows that the model does not perform well, even when modeled concentrations appear to match  
88 measurements when using  $\text{RH}_{\text{room,meas}}$ . However, when  $\text{RH}_{\text{room,opt}}$  is used for the IMAGES  
89 simulations, the pH is consistently around a value we would expect indoors (Figure S11 and S12).<sup>4</sup>

90  
91

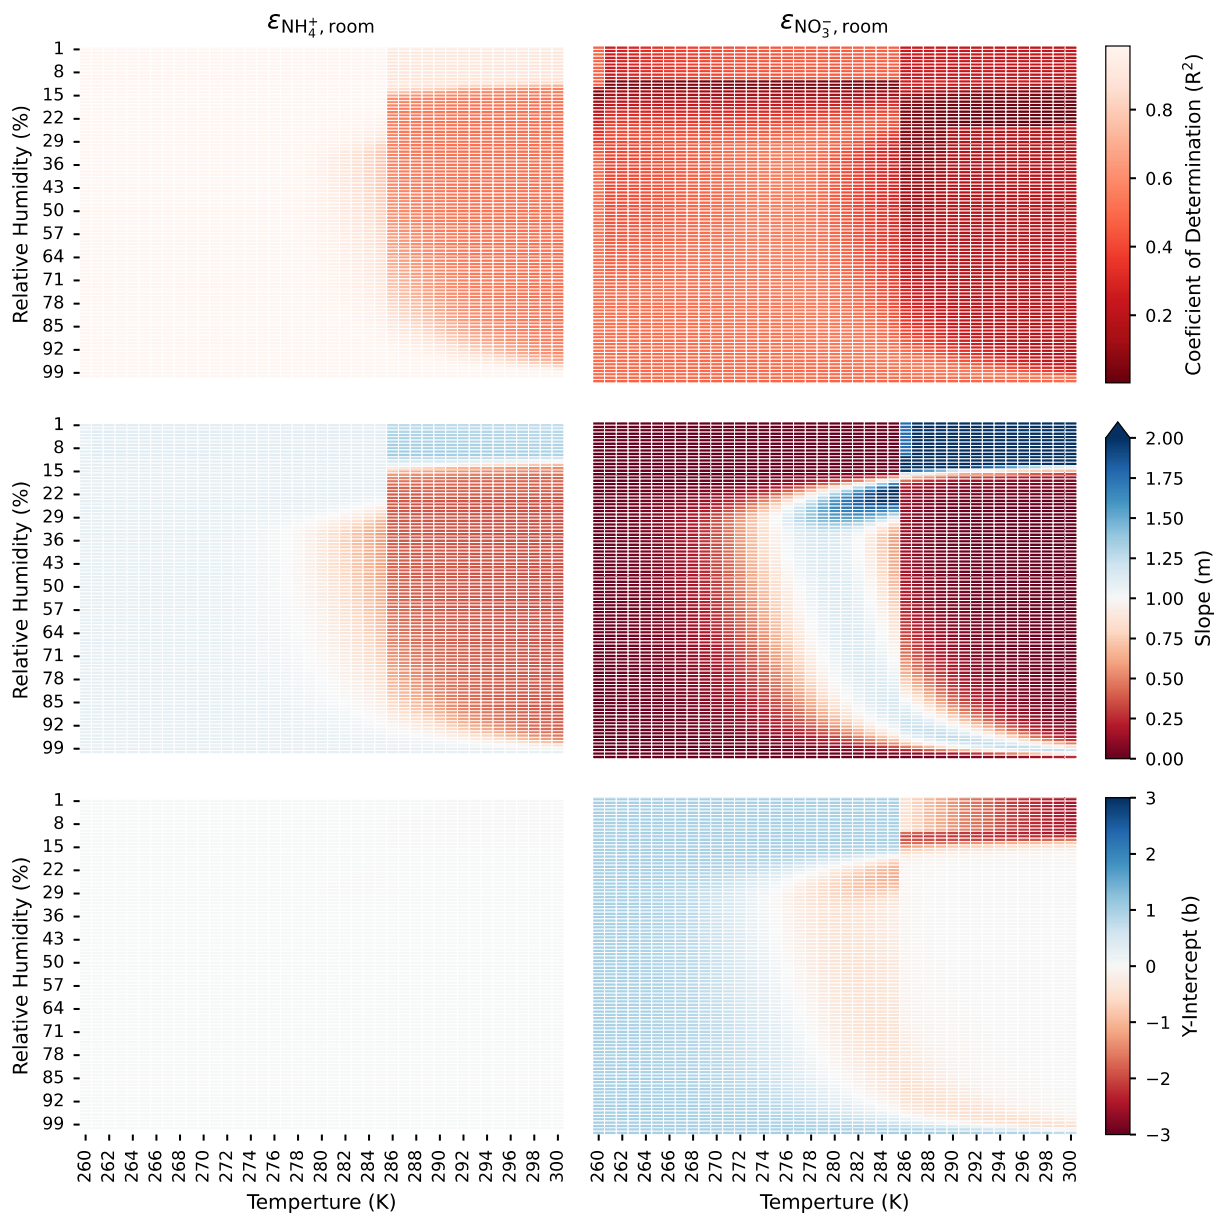

**Figure S1.** Heatmaps of  $R^2$  (a, b),  $m$  (c, d), and  $b$  (c, d) from the lines of best fit of ISORROPIA  $\epsilon_{i,\text{room}}$  vs. measured  $\epsilon_{i,\text{room}}$ . Each cell represents a  $T$  and RH case that was inputted into ISORROPIA.

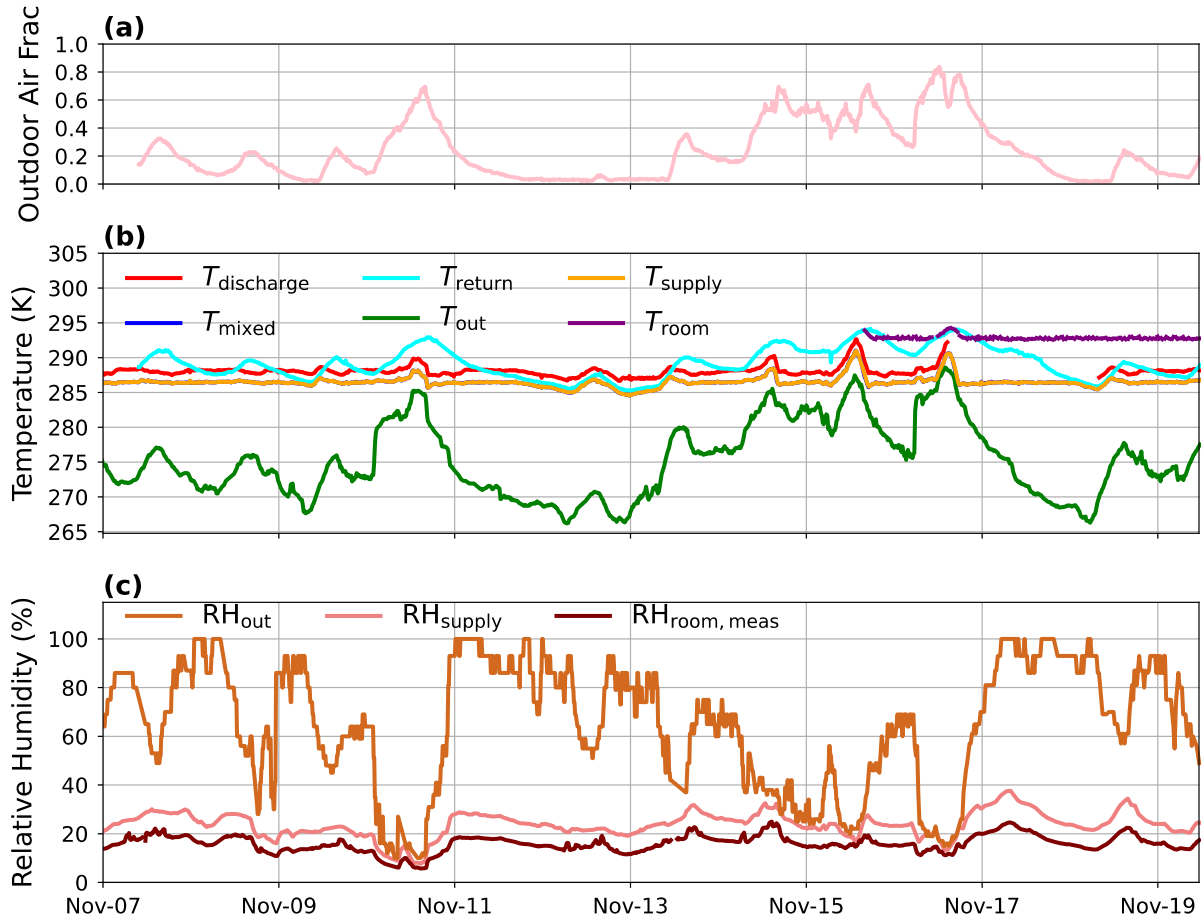

**Figure S2.** Timeseries of the fraction of outdoor air that enters the mixing box (a), the different temperatures ( $T_{\text{discharge}}$ ,  $T_{\text{mixed}}$ ,  $T_{\text{return}}$ ,  $T_{\text{out}}$ ,  $T_{\text{supply}}$ , and  $T_{\text{room}}$ ) (b), and RHs ( $RH_{\text{out}}$ ,  $RH_{\text{supply}}$ ,  $RH_{\text{room, meas}}$ ) (c) measured during the ATHLETIC campaign. The outdoor RH was obtained from NOAA.

93

94

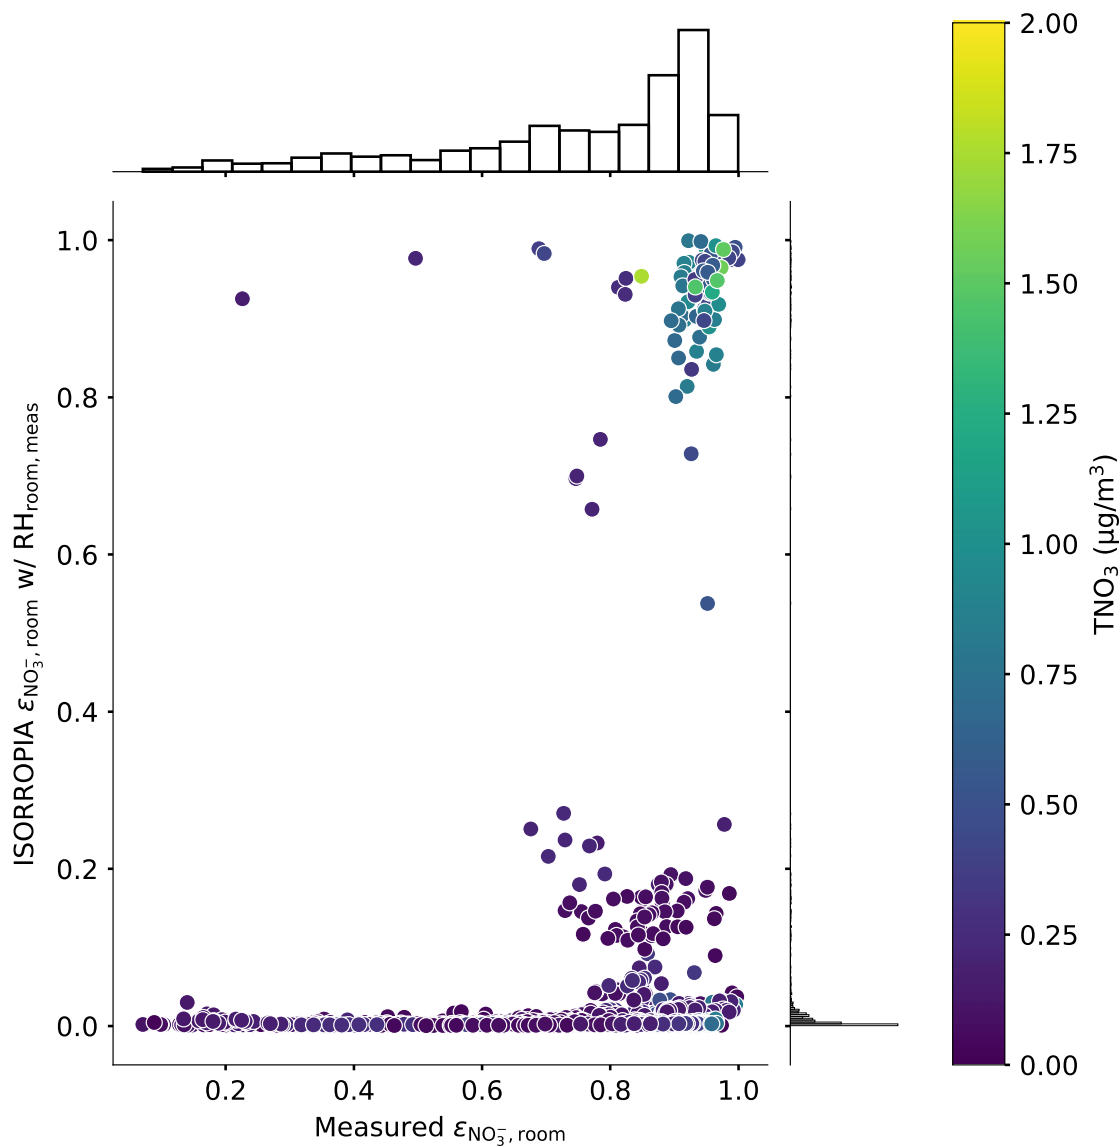

**Figure S3.** Comparison of ISORROPIA simulated (using  $\text{RH}_{\text{room, meas}}$ ) and measured  $\epsilon_{i, \text{room}}$ . The markers are colored by the amount of total nitrate ( $\text{TNO}_3 = \text{NO}_3^- + \text{HNO}_3$ ). The histograms on the top and right side of the plot show the distribution of data points for standalone ISORROPIA simulated results and measurements, respectively.



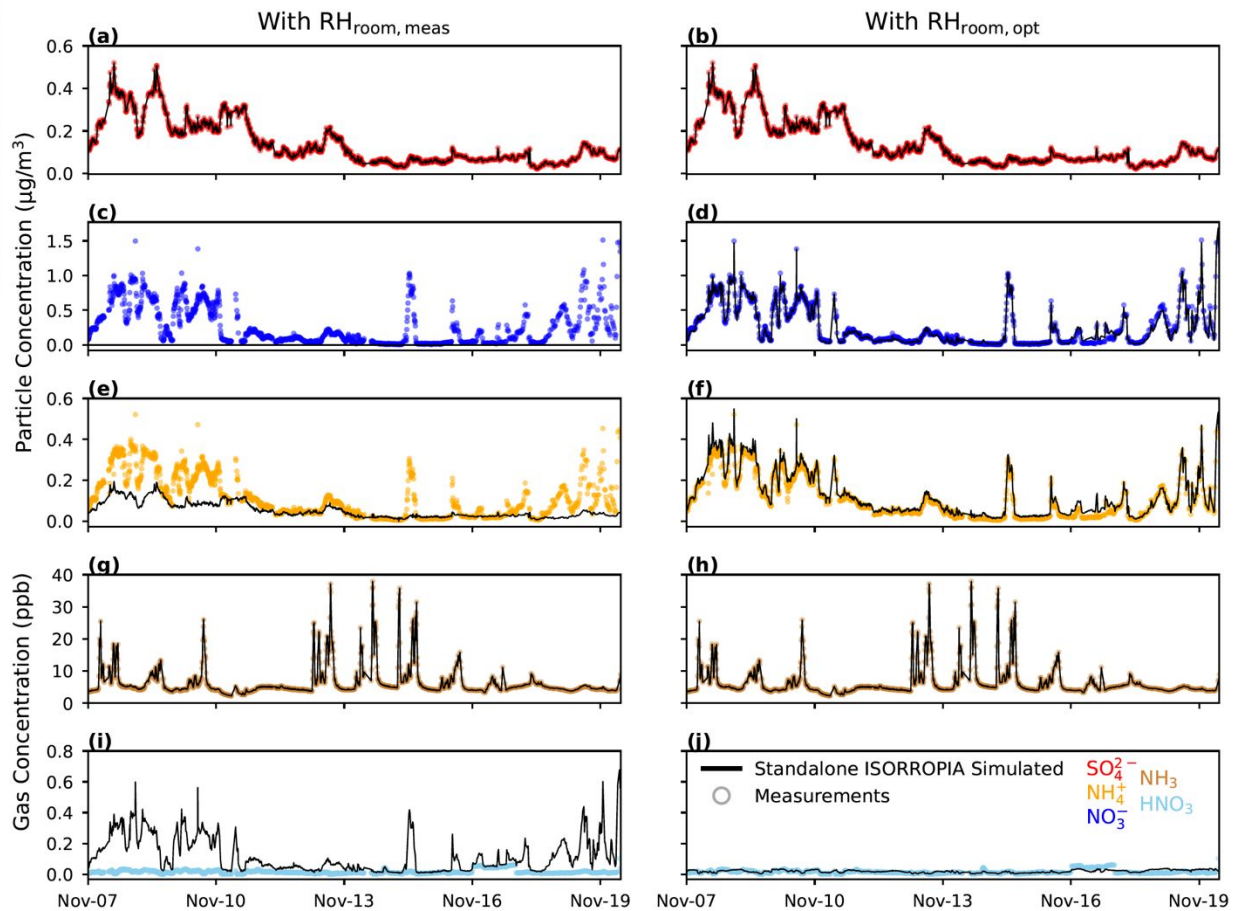

**Figure S4.** Timeseries of standalone ISORROPIA simulated (black line) particle and gas concentrations using  $RH_{\text{room,meas}}$  (left column) and  $RH_{\text{room,opt}}$  (right column). Measured concentrations (open circles) are shown for comparison. ISORROPIA was run in the stable mode here.

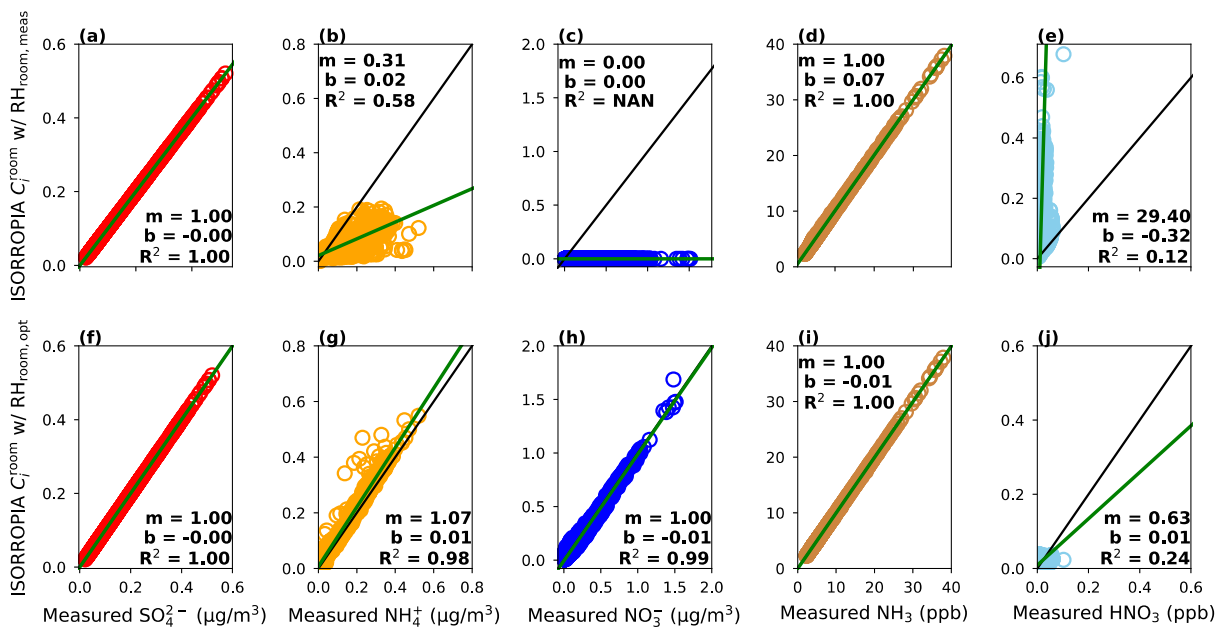

**Figure S5.** Comparison of ISORROPIA-partitioned concentrations against measured concentrations using  $RH_{\text{room,meas}}$  (a-e) and  $RH_{\text{room,opt}}$  (f-j) as inputs to ISORROPIA. The green line represents the line of best fit calculated with an orthogonal regression, while the black line is the 1:1 line. The correlation coefficient,  $R^2$ ; slope,  $m$ ; and  $y$ -intercept,  $b$ , are displayed for each regression. ISORROPIA was run in the stable mode here.

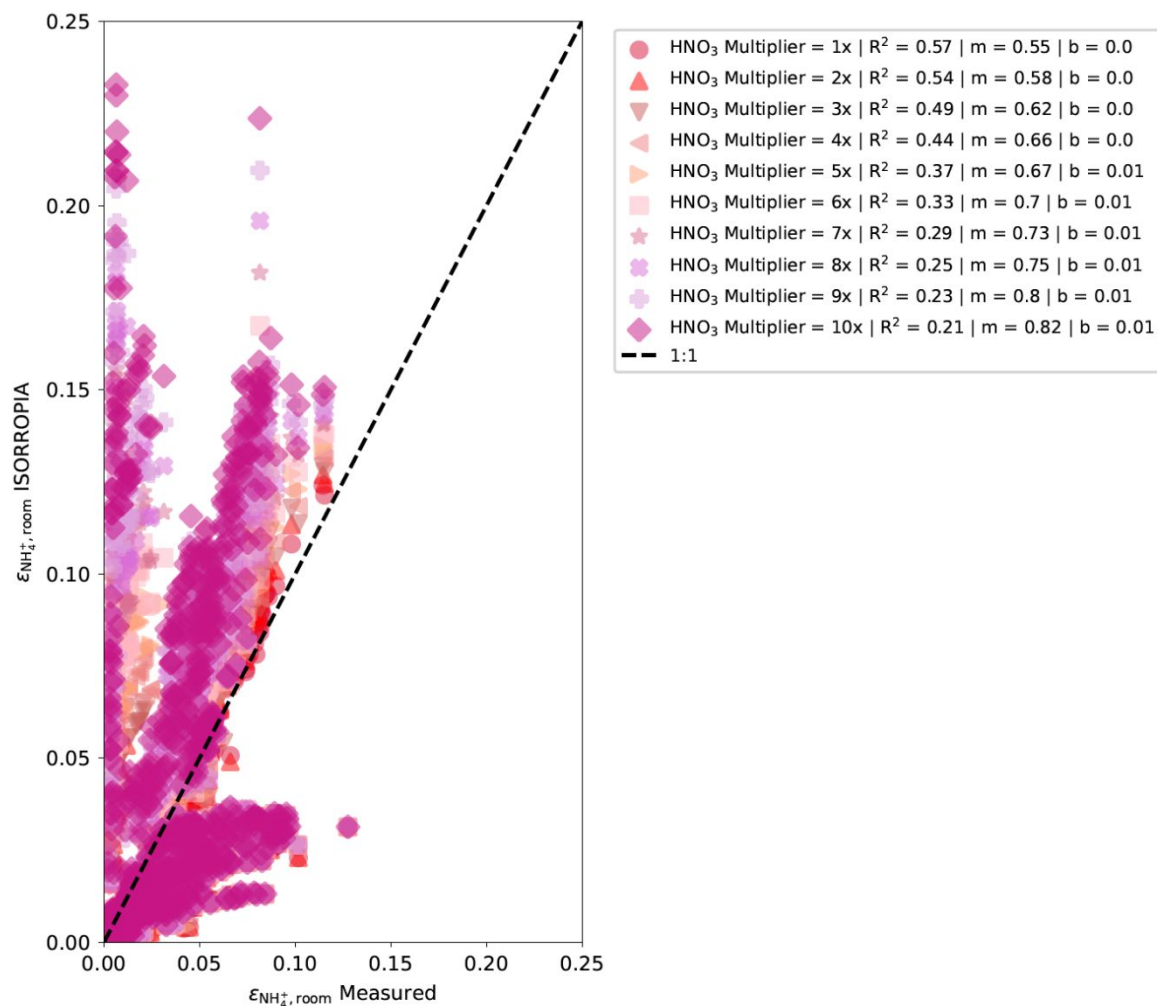

**Figure S6.** A comparison of ISORROPIA vs. measured  $\epsilon_{\text{NH}_4^+, \text{room}}$  best fit lines for each increased HNO<sub>3</sub> case. The amount HNO<sub>3</sub> was increased by was ranged from no increase (HNO<sub>3</sub> Multiplier = 1x) to ten times the original amount (HNO<sub>3</sub> Multiplier = 10x) and is listed on the right-side table. The table also includes the line of best-fit statistics, which are  $R^2$ ,  $m$ , and  $b$ .

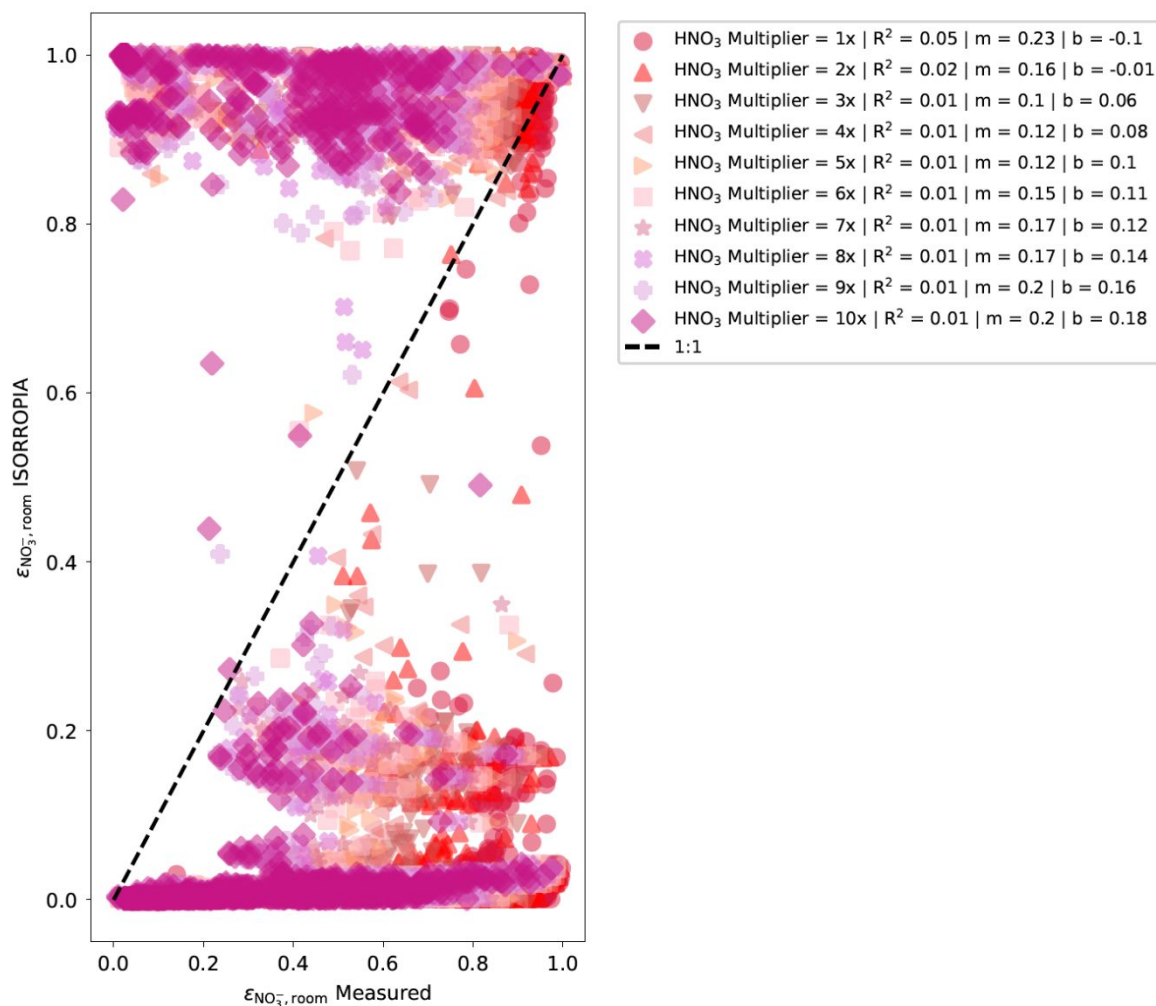

**Figure S7.** A comparison of standalone ISORROPIA simulated vs. measured  $\epsilon_{\text{NO}_3, \text{room}}$  best fit lines for each increased HNO<sub>3</sub> case. The amount HNO<sub>3</sub> was increased by was ranged from no increase (HNO<sub>3</sub> Multiplier = 1x) to ten times the original amount (HNO<sub>3</sub> Multiplier = 10x) and is listed on the right-side table. The table also includes the line of best-fit statistics, which are  $R^2$ ,  $m$ , and  $b$ .

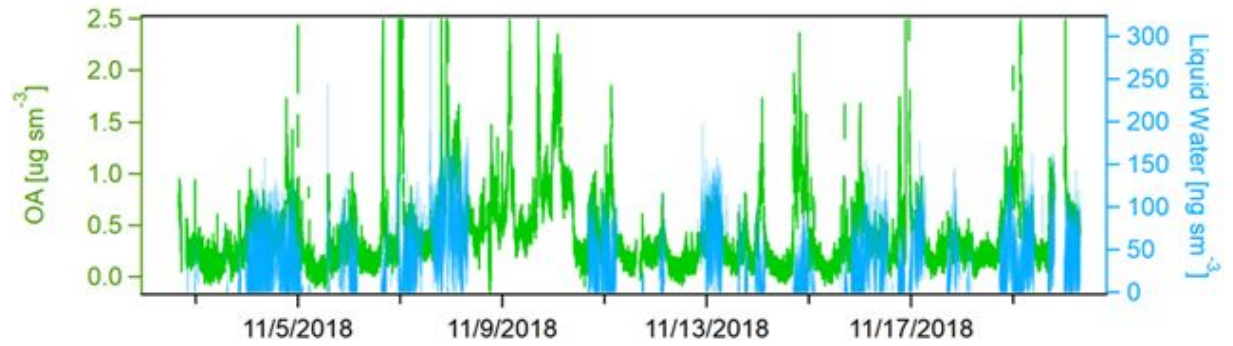

**Figure S8.** Time series of OA mass on left y-axis and OA ALW on right y-axis (calculated using Rickards *et al.*<sup>5</sup>) This data assumes a constant RH of 75%.

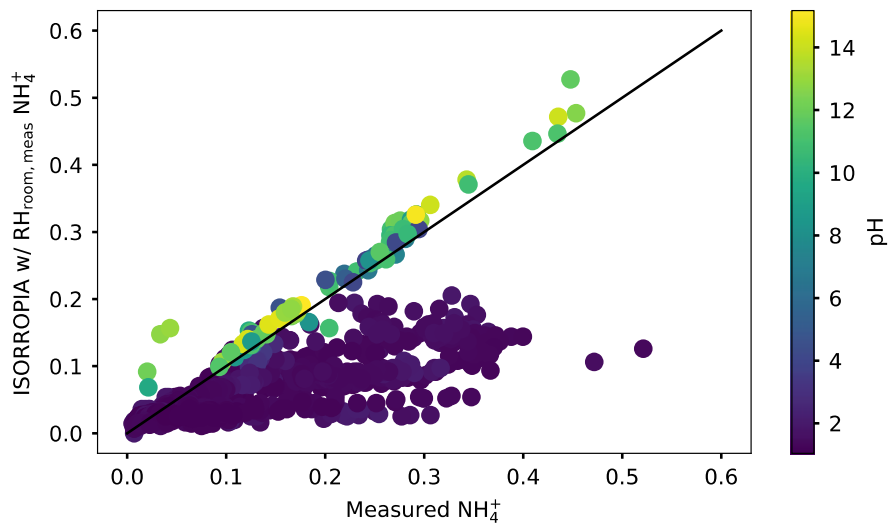

**Figure S9.** One-to-one plot comparing standalone ISORROPIA simulated  $\text{NH}_4^+$ , using  $\text{RH}_{\text{room, meas}}$ , against measured  $\text{NH}_4^+$ . Data points are colored by the pH calculated by ISORROPIA.

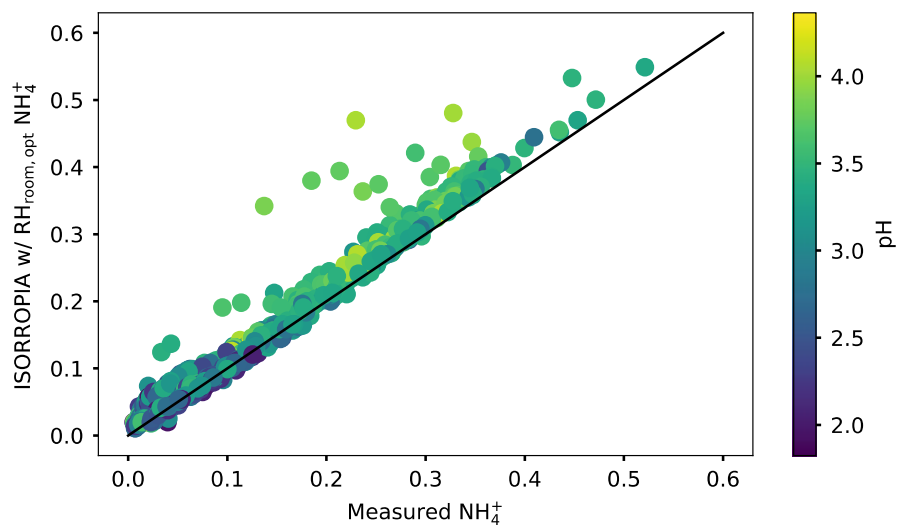

**Figure S10.** One-to-one plot comparing standalone ISORROPIA simulated  $\text{NH}_4^+$ , using  $\text{RH}_{\text{room,opt}}$ , against measured  $\text{NH}_4^+$ . Data points are colored by the pH calculated by ISORROPIA.

102

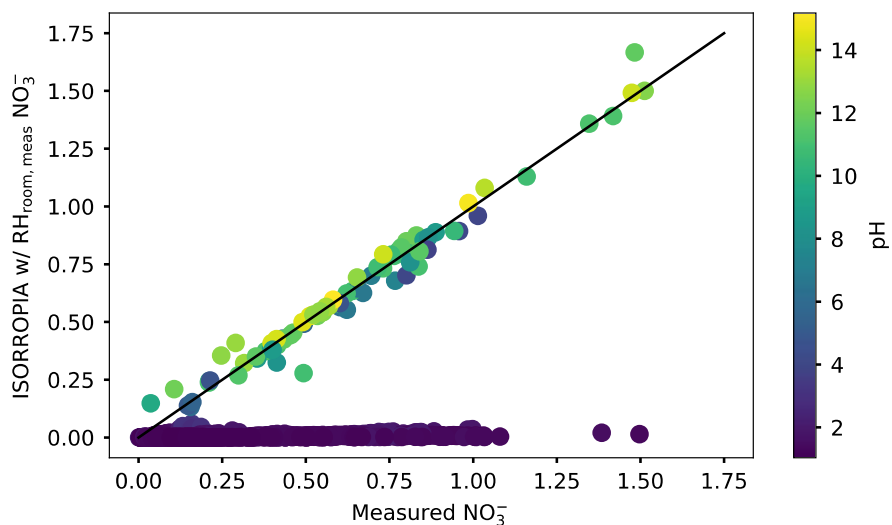

**Figure S11.** One-to-one plot comparing standalone ISORROPIA simulated  $\text{NO}_3^-$ , using  $\text{RH}_{\text{room,meas}}$ , against measured  $\text{NO}_3^-$ . Data points are colored by the pH calculated by ISORROPIA. A pH above 5 in the absence of refractory species is considered unrealistic.<sup>6</sup>

103

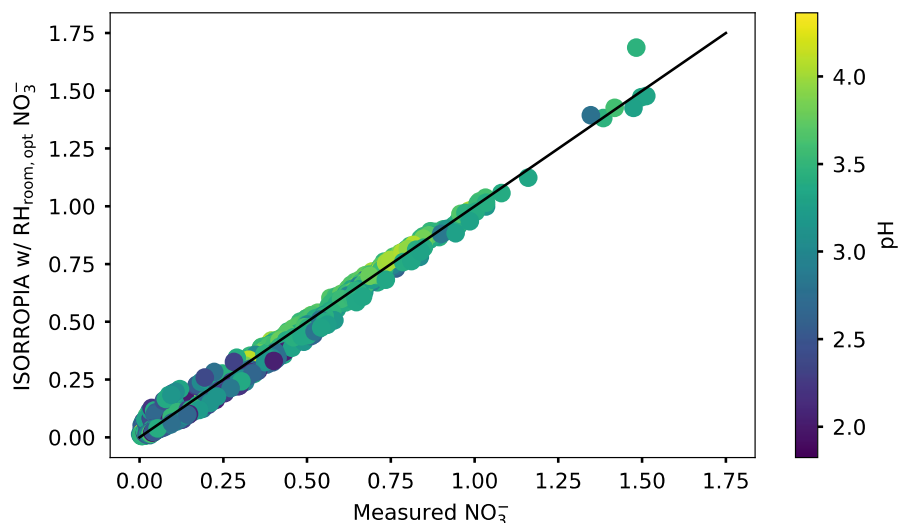

**Figure S12.** One-to-one plot comparing standalone ISORROPIA simulated  $\text{NO}_3^-$ , using  $\text{RH}_{\text{room,opt}}$ , against measured  $\text{NO}_3^-$ . Data points are colored by the pH calculated by ISORROPIA.

104

### 105 **S3. Optimizing indoor environmental conditions**

106 The environmental conditions that minimized ISORROPIA's partitioning error were picked based  
 107 on the minimum distance between a perfect one-to-one correlation and the actual correlation of  
 108 ISORROPIA vs. measured  $\epsilon_{\text{room}}$  (described in Section 2.3). Figure S13 shows that the distance was  
 109 smallest when the  $T$  was low or RH was high. However, since  $T_{\text{room}}$  was controlled at  $\sim 293$  K throughout  
 110 the ATHLETIC campaign, a single optimized RH value ( $\text{RH}_{\text{room,opt}}$ ) was chosen at 293 K. Figure S14  
 111 shows just the 293 K column from Figure S13. The smallest distance in the 293 K column (Figure S14)  
 112 occurred at RH = 98%, and thus,  $\text{RH}_{\text{room,opt}} = 98\%$ . Optimizing the RH at  $T = 293$  K gives a similarly  
 113 exceptional partitioning agreement as optimizing the  $T$  and RH across the full range of values. For  
 114 instance, the distance at  $T = 293$  K and RH = 98% is 0.25. When considering the full range of  
 115 environmental conditions, the smallest distance is 0.24, which occurs at  $T = 274$  K and RH = 45%. Since  
 116 these distances are almost the same, the  $T = 293$  K and RH = 98% condition was chosen to preserve the  
 117 room temperature measurements.

118

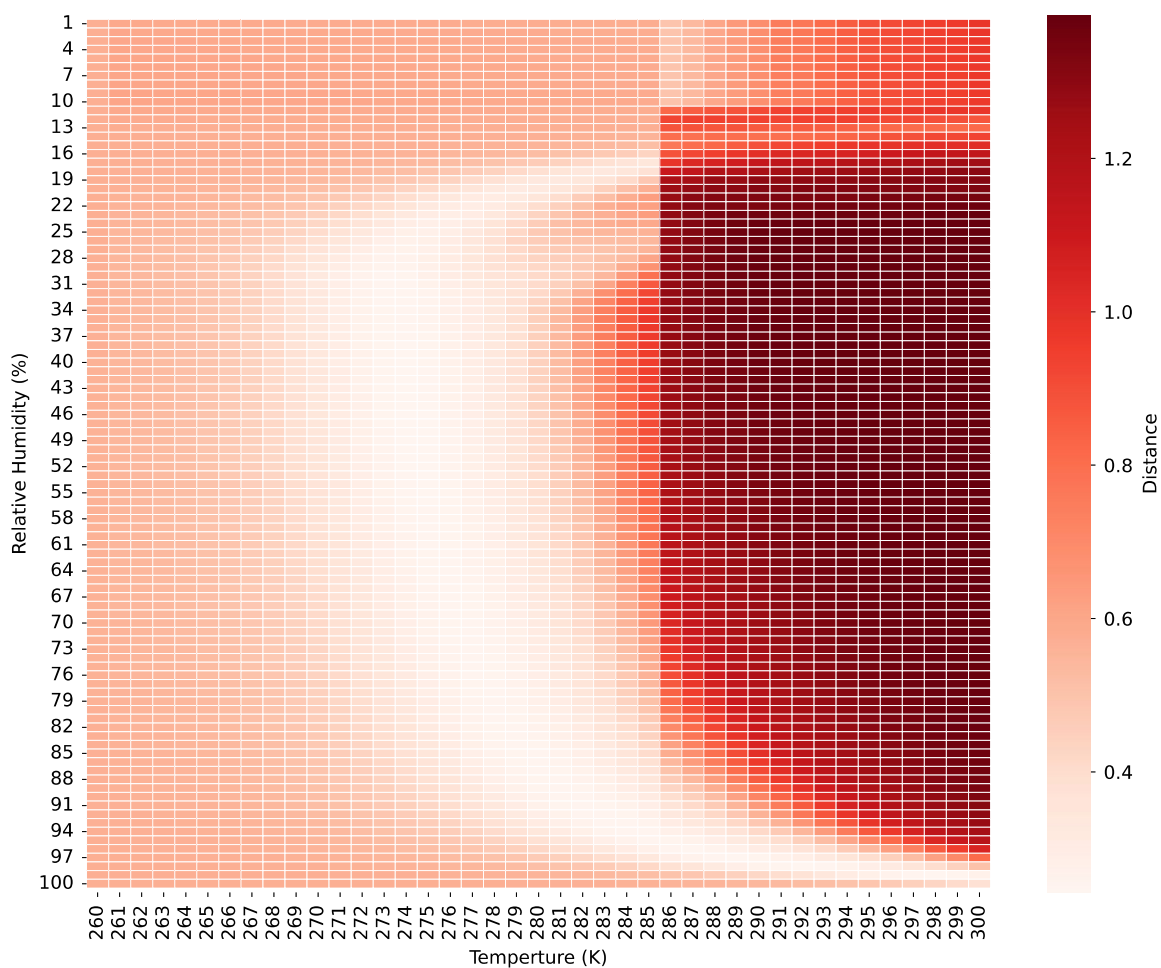

**Figure S13.** Heatmap of the distance between a perfect one-to-one correlation and the actual correlation of  $\epsilon_{\text{room}}$ . Each cell represents a  $T$  and RH case where  $\epsilon_{\text{room}}$  was calculated, and the modeled-measured line of best-fit statistics was compared against perfect one-to-one best-fit statistics.



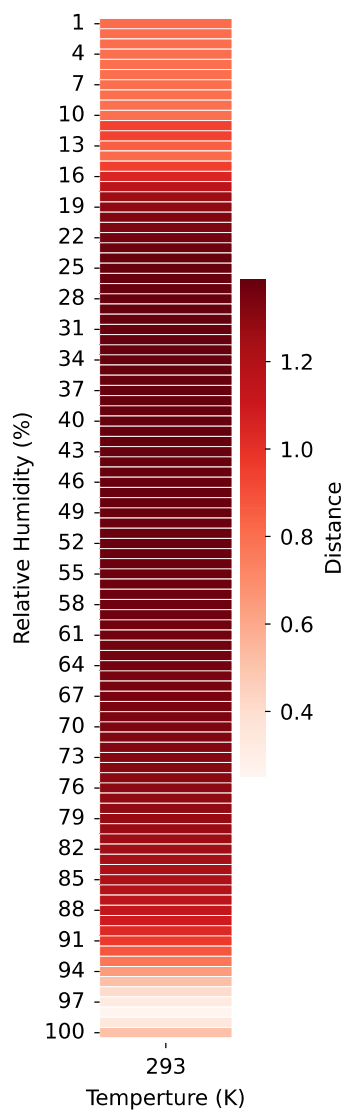

**Figure S14.** The distance between a perfect one-to-one correlation and the actual correlation of  $\epsilon_{\text{room}}$  at 293 K.

121 **S4. Relating emissions and deposition rates to  $\Delta\text{CO}_2$**

122  $\Delta\text{CO}_2$  can be used as an indicator of building occupancy when the number of occupants is not  
 123 provided. Therefore, linear trends relating  $v_{\text{d,HNO}_3}$ ,  $v_{\text{d,p}}$ , and  $E_{\text{NH}_3}$  to  $\Delta\text{CO}_2$  (Figure S15) were derived  
 124 using the same algorithm described in Section 2.5.  $\Delta\text{CO}_2$  denotes the difference between indoor and  
 125 outdoor  $\text{CO}_2$  concentrations. Since outdoor  $\text{CO}_2$  was not measured, it was taken to be the 5<sup>th</sup> percentile of  
 126 the indoor  $\text{CO}_2$  concentration ( $\sim 424.1$  ppm). The analytical solution to Eq. 3 (Eq. S1) allows  $C_i$  to be  
 127 approximated after a short period of time ( $\delta^t$ , h):

$$C_i^{t+1} \cong C_i^t \exp(-l_i^t \delta^t) + \frac{S_i^t}{l_i^t} (1 - \exp(-l_i^t \delta^t)) \quad (\text{S1})$$

128 By using  $\lambda_{\text{supply}}$  and an  $N$  number of  $C_{i,\text{supply}}$  measurements with  $\varepsilon_{i,\text{room}}$  (which was computed by  
 129 ISORROPIA),  $N-1$   $E_{\text{NH}_3}$ ,  $\beta_{\text{p}}$ , and  $\beta_{\text{HNO}_3}$  vectors occurring between two adjacent time-series  
 130 measurements were explicitly back-calculated from Eq. S1 using a built-in Python solver. The source and  
 131 loss rates (Equations S2 – S7) were specific to the species considered when solving for each parameter.  
 132 For instance, non-volatile  $\text{SO}_4^{2-}$ , the species considered when solving for  $\beta_{\text{p}}$ , does not have any gas-phase  
 133 sources or losses indoors. Therefore, the source and loss rates can be defined as:

$$S_{\text{TSO}_4^{2-}} = \lambda_{\text{supply}} C_{\text{TSO}_4^{2-},\text{supply}} C_{\text{TSO}_4^{2-},\text{supply}} \quad (\text{S2})$$

$$l_{\text{TSO}_4^{2-}} = \lambda_{\text{supply}} + \beta_{\text{p}} \quad (\text{S3})$$

134  $\text{NO}_3^-$  and  $\text{HNO}_3$  were the only species considered when solving for  $\beta_{\text{HNO}_3}$ . Thus, the source and loss rates  
 135 used here were:

$$S_{\text{TNO}_3^-} = \lambda_{\text{supply}} C_{\text{TNO}_3^-, \text{supply}} C_{\text{TNO}_3^-, \text{supply}} \quad (\text{S4})$$

$$l_{\text{TNO}_3^-} = (1 - \varepsilon_{\text{TNO}_3^-, \text{room}}) (\lambda_{\text{supply}} + \beta_{\text{HNO}_3}) + \varepsilon_{\text{TNO}_3^-, \text{room}} \varepsilon_{\text{TNO}_3^-, \text{room}} (\lambda_{\text{supply}} + \beta_{\text{p}}) \quad (\text{S5})$$

136 Similarly,  $\text{NH}_4^+$  and  $\text{NH}_3$  were the only species considered when solving for  $E_{\text{NH}_3}$ , and so the source and  
 137 loss rates for this case were:

$$S_{\text{TNH}_4^+} = \lambda_{\text{supply}} C_{\text{TNH}_4^+, \text{supply}} C_{\text{TNH}_4^+, \text{supply}} + \frac{E_{\text{NH}_3}}{V} \quad (\text{S6})$$

$$l_{\text{TNH}_4^+} = (1 - \varepsilon_{\text{TNH}_4^+, \text{room}}) \lambda_{\text{supply}} + \varepsilon_{\text{TNH}_4^+, \text{room}} \varepsilon_{\text{TNH}_4^+, \text{room}} (\lambda_{\text{supply}} + \beta_p) \quad (\text{S7})$$

138           When a concentration was below the detection limit, data at that timestep and the timestep prior  
 139 were not included in the linear regressions. Limits of detection for  $\text{SO}_4^{2-}$ ,  $\text{NH}_4^+$ , and  $\text{NO}_3^-$  were  
 140 determined using methods from Drewnick *et al.*<sup>7</sup> Limits of detection for  $\text{NH}_3$  and  $\text{HNO}_3$  were provided  
 141 on the measurement instrument manufacturers' website.<sup>8,9</sup> Detection limit values are provided in Table 1.  
 142 Standard errors for the slopes can be found in Table 2. Additionally, the trendlines pertaining to occupants  
 143 and  $\Delta\text{CO}_2$  when no data points were removed from the regression are shown in Figures S16 and S17.  
 144 Therefore, Figures S16 and S17 show the need for removing data points associated with concentrations  
 145 that dip below the detection limit.

146

**Table S1.** Limits of Detection for  $\text{SO}_4^{2-}$ ,  $\text{NH}_4^+$ ,  $\text{NO}_3^-$ ,  $\text{NH}_3$  and  $\text{HNO}_3$ .

147

| Species            | Limit of Detection ( $\frac{\mu\text{g}}{\text{m}^3}$ ) |
|--------------------|---------------------------------------------------------|
| $\text{SO}_4^{2-}$ | 0.0288                                                  |
| $\text{NH}_4^+$    | 0.0036                                                  |
| $\text{NO}_3^-$    | 0.0132                                                  |
| $\text{NH}_3$      | 0.004                                                   |
| $\text{HNO}_3$     | 0.0035                                                  |

148

**Table S2.** Percentage of room measurements used to evaluate IMAGES simulation that fell below the limit of detection (LOD).

| Species            | Percentage below LOD |
|--------------------|----------------------|
| $\text{SO}_4^{2-}$ | 1.4%                 |
| $\text{NH}_4^+$    | 2.4%                 |
| $\text{NO}_3^-$    | 0%                   |
| $\text{NH}_3$      | 0%                   |
| $\text{HNO}_3$     | 0.64%                |

**Table S3.** Standard errors of slopes from linear regression relating that relate occupants or  $\Delta\text{CO}_2$  to  $v_{d,\text{HNO}_3}$ ,  $v_{d,p}$ , and  $E_{\text{NH}_3}$ .

149

|                      | Figure 4        | Figure S15      |
|----------------------|-----------------|-----------------|
| $v_{d,\text{HNO}_3}$ | 0.0033          | 0.00031         |
| $v_{d,p}$            | $5.4\text{e-}5$ | $5.4\text{e-}6$ |
| $v_{d,p}$            | 0.006           | 0.0073          |

150

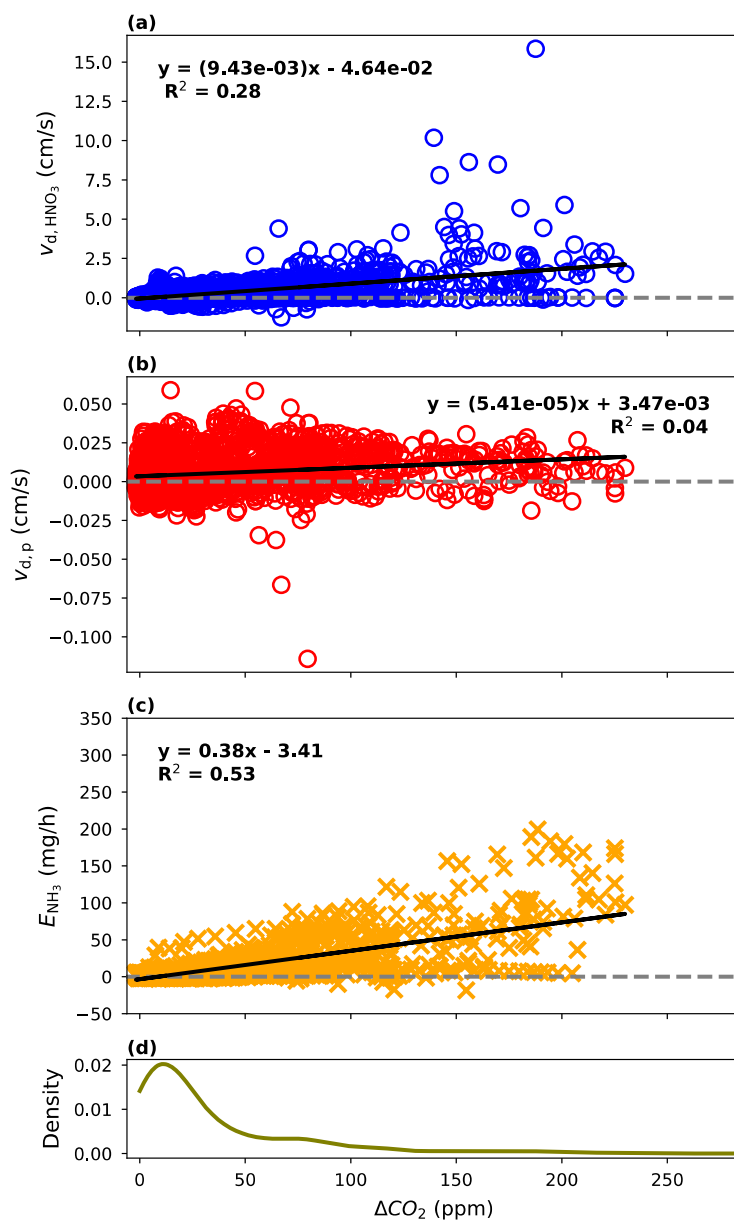

**Figure S15.** Linear trends relating  $\Delta CO_2$  to  $v_{d,HNO_3}$  (a),  $v_{d,p}$  (b), and  $E_{NH_3}$  (c). A probability density function (PDF) (d) is also displayed to show the distribution of data points related to  $\Delta CO_2$ . The best fit line (black line), best-fit equations, and  $R^2$  value are displayed in each plot (a-c).

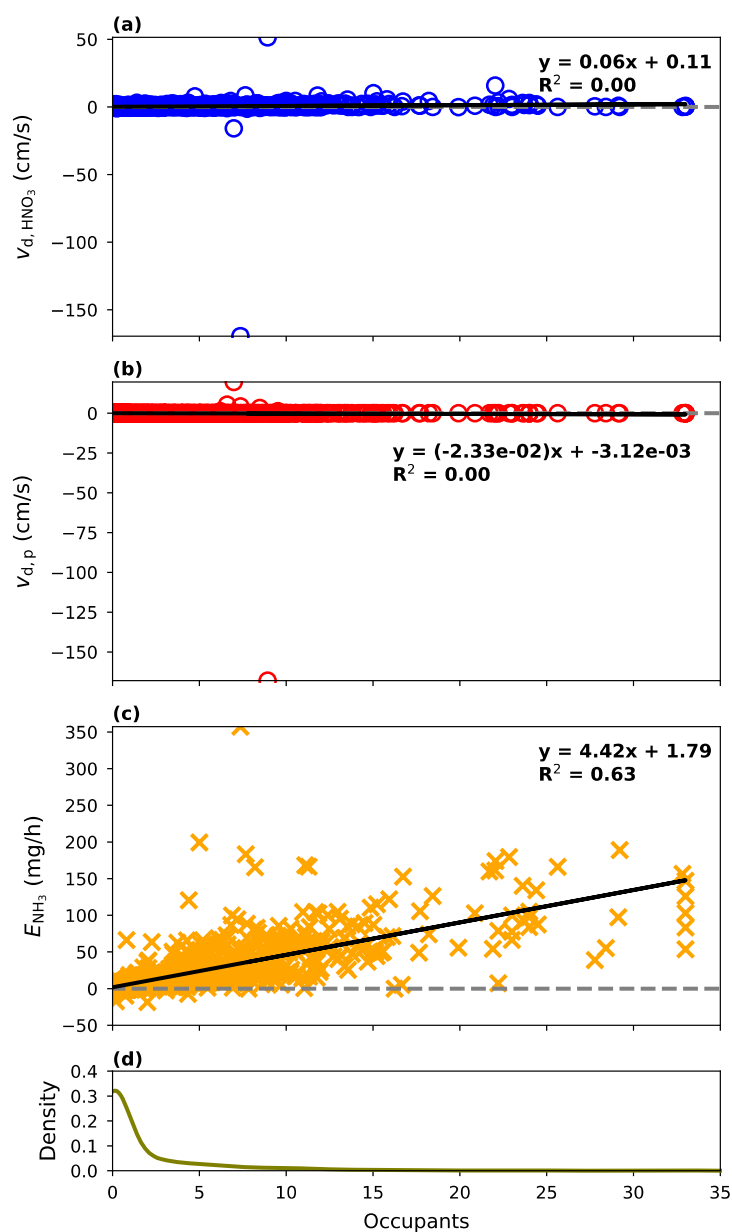

**Figure S16.** Linear trends relating occupants to  $v_{d,HNO_3}$  (a),  $v_{d,p}$  (b), and  $E_{NH_3}$  (c). A probability density function (PDF) (d) is also displayed to show the distribution of data points related to occupants. The best fit line (black line), best-fit equations, and  $R^2$  value are displayed in each plot (a-c). No data points were removed from the linear regressions here.



**Figure S17.** Linear trends relating  $\Delta CO_2$  to  $v_{d,HNO_3}$  (a),  $v_{d,p}$  (b), and  $E_{NH_3}$  (c). A probability density function (PDF) (d) is also displayed to show the distribution of data points related to  $\Delta CO_2$ . The best fit line (black line), best-fit equations, and  $R^2$  value are displayed in each plot (a-c). No data points were removed from the linear regressions here.

154

155

156 **S5. IMAGES evaluation**

157 IMAGES was run using the  $\Delta\text{CO}_2$ -based deposition and emission trends described in Section S3.

158 Figures S18 and S19 show similar timeseries and one-to-one comparison results to those presented in

159 Section 3.3; thus, the analysis is similar. However, one distinct difference is that  $\text{NH}_3$  has slightly worse

160 modeled-measured agreement when using the  $\Delta\text{CO}_2$ -based trends than when using the occupant-based

161 trends. This may be because  $\Delta\text{CO}_2$  is not as accurate at indicating the level of occupancy in a building as

162 physically counting each person. Despite this, IMAGES was still run with  $\Delta\text{CO}_2$ -based trends since it is a

163 more standard field measurement than counting occupants.

164



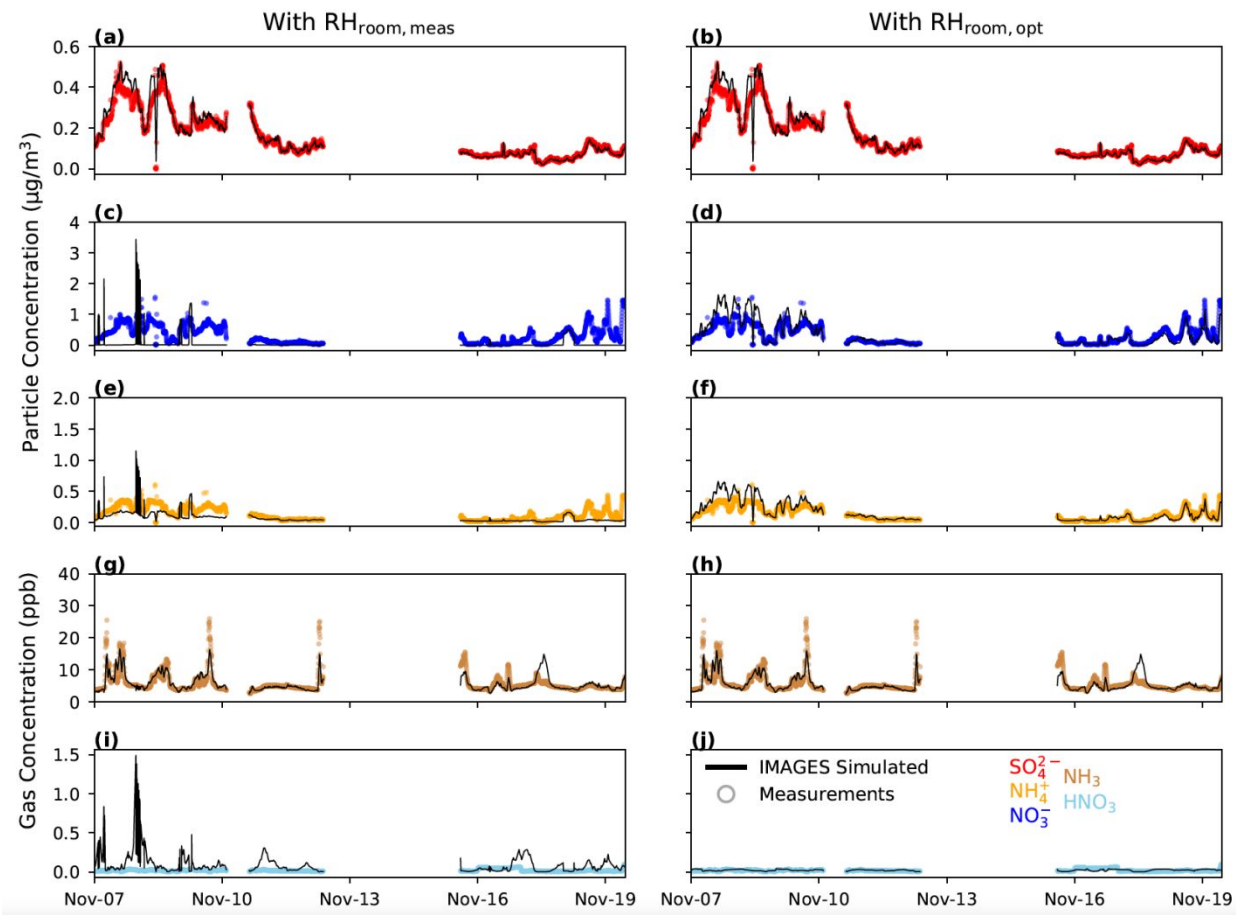

**Figure S18.** Timeseries of IMAGES simulated (black line) particle and gas concentrations using  $RH_{room,meas}$  (left column) and  $RH_{room,opt}$  (right column).  $\Delta CO_2$ -based deposition and emission trends were utilized for IMAGES here. Measured concentrations (open circles) are shown for comparison.

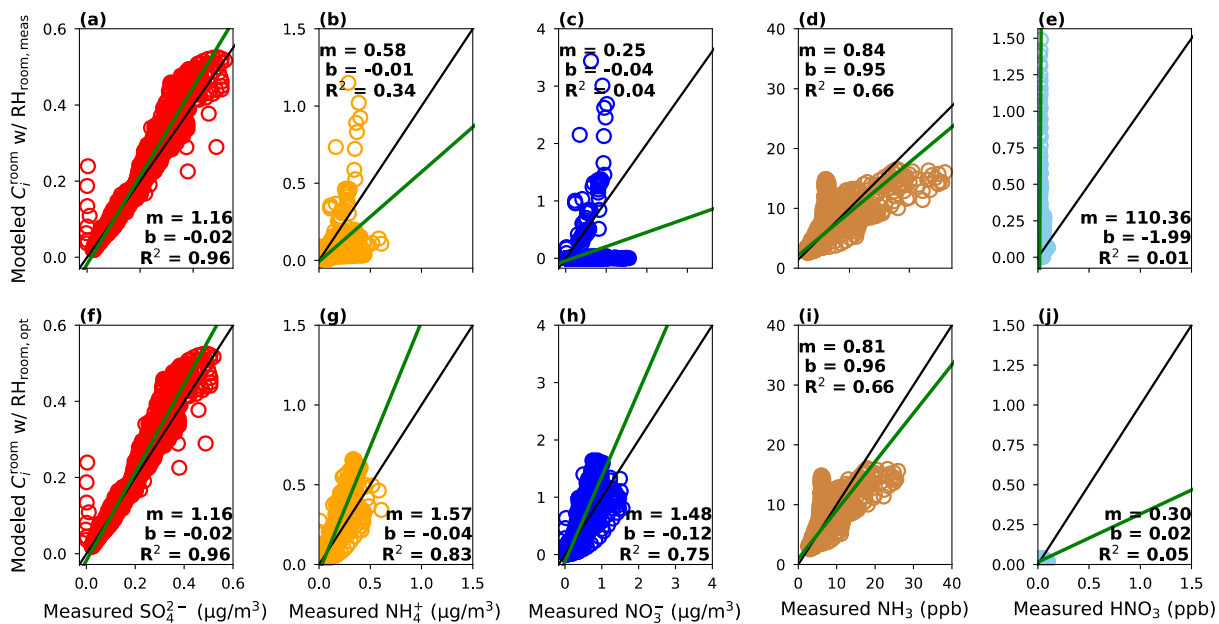

165

**Figure S19.** Comparison of IMAGES simulated and measured concentrations using  $RH_{room,meas}$  (a-e) and  $RH_{room,opt}$  (f-j) as model inputs.  $\Delta CO_2$ -based deposition and emission trends were utilized for IMAGES here. The green line represents the line of best fit calculated with an orthogonal regression, while the black line is the 1:1 line. The correlation coefficient,  $R^2$ ; slope,  $m$ ; and y-intercept,  $b$ , are displayed for each regression.

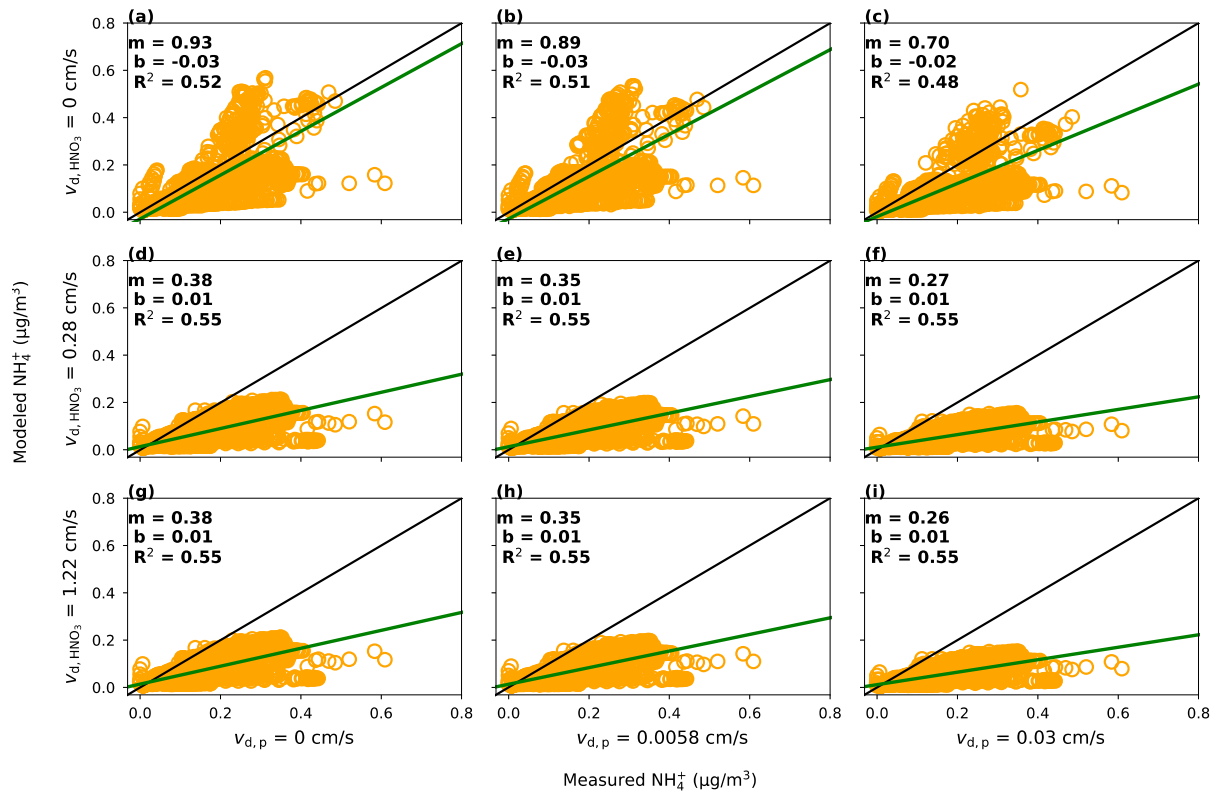

**Figure S20.** One-to-one plots comparing modeled  $NH_4^+$  concentrations in the room to  $NH_4^+$  concentration measurements. IMAGES was run with the measured temperature and RH conditions.  $v_{d,p}$  was set to either  $0 \frac{cm}{s}$  (left column),  $0.0058 \frac{cm}{s}$  (middle column), or  $0.03 \frac{cm}{s}$  (right column). Additionally,  $v_{d,HNO_3}$  was set to either  $0 \frac{cm}{s}$  (top row),  $0.28 \frac{cm}{s}$  (middle row), or  $1.22 \frac{cm}{s}$  (bottom row).

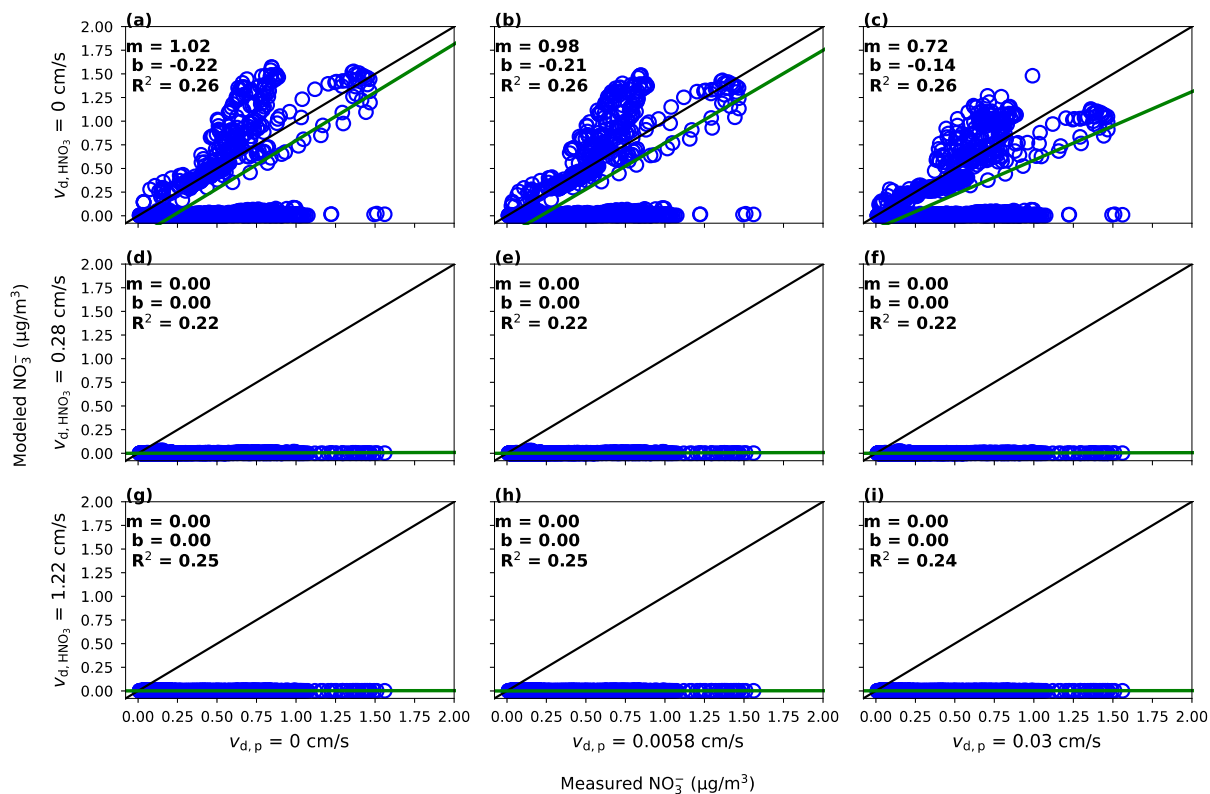

**Figure S21.** One-to-one plots comparing modeled  $\text{NO}_3^-$  concentrations in the room to  $\text{NO}_3^-$  concentration measurements. IMAGES was run with the measured temperature and RH conditions.  $v_{d,p}$  was set to either  $0 \frac{\text{cm}}{\text{s}}$  (left column),  $0.0058 \frac{\text{cm}}{\text{s}}$  (middle column), or  $0.03 \frac{\text{cm}}{\text{s}}$  (right column). Additionally,  $v_{d,HNO_3}$  was set to either  $0 \frac{\text{cm}}{\text{s}}$  (top row),  $0.28 \frac{\text{cm}}{\text{s}}$  (middle row), or  $1.22 \frac{\text{cm}}{\text{s}}$  (bottom row).

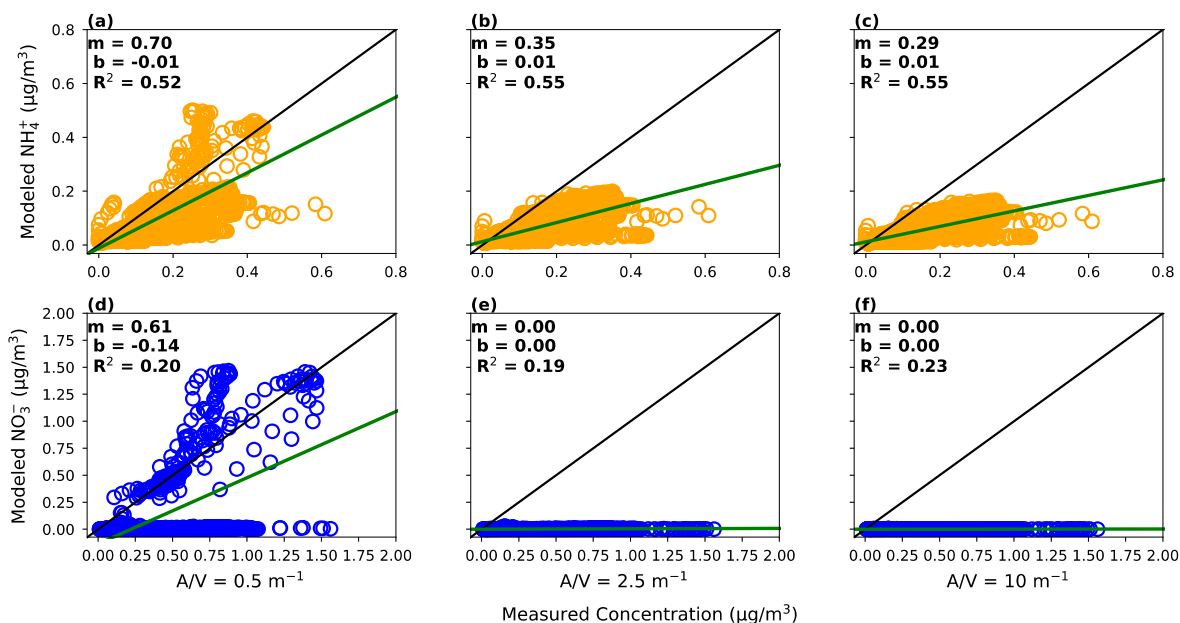

**Figure S22.** One-to-one plots comparing modeled  $\text{NH}_4^+$  concentrations in the room to  $\text{NH}_4^+$  concentration measurements are shown in the top row. One-to-one plots comparing modeled  $\text{NO}_3^-$  concentrations in the room to  $\text{NO}_3^-$  concentration measurements are shown in the bottom row. IMAGES was run with the measured temperature and RH conditions. The area-to-volume ratio in the room was set to either 0.5  $\text{m}^{-1}$ (left column), 2.5  $\text{m}^{-1}$ (middle column), or 10  $\text{m}^{-1}$  (right column).

169

## 170 References

- 171 1. Clafin MS, Pagonis D, Finewax Z, et al. An in situ gas chromatograph with automatic detector  
 172 switching between PTR- and EI-TOF-MS: isomer-resolved measurements of indoor air.  
 173 *Atmospheric Measurement Techniques*. 2021;14(1):133-152.
- 174 2. Finewax Z, Pagonis D, Clafin MS, et al. Quantification and source characterization of volatile  
 175 organic compounds from exercising and application of chlorine-based cleaning products in a  
 176 university athletic center. *Indoor Air*. 2021;31(5):1323-1339.
- 177 3. Katz EF, Guo HY, Campuzano-Jost P, et al. Quantification of cooking organic aerosol in the  
 178 indoor environment using aerodyne aerosol mass spectrometers. *Aerosol Science and Technology*.  
 179 2021;55(10):1099-1114.
- 180 4. Liu C, Wang H, Guo H. Redistribution of PM<sub>2.5</sub>-associated nitrate and ammonium during  
 181 outdoor-to-indoor transport. *Indoor Air*. 2019;29(3):460-468.

- 182 5. Rickards AMJ, Miles REH, Davies JF, Marshall FH, Reid JP. Measurements of the Sensitivity of  
183 Aerosol Hygroscopicity and the  $\kappa$  Parameter to the O/C Ratio. *The Journal of Physical Chemistry*  
184 *A*. 2013;117(51):14120-14131.
- 185 6. Pye HOT, Nenes A, Alexander B, et al. The acidity of atmospheric particles and clouds. *Atmos*  
186 *Chem Phys*. 2019;20(8):4809-4888.
- 187 7. Drewnick F, Hings SS, Alfarra MR, Prevot ASH, Borrmann S. Aerosol quantification with the  
188 Aerodyne Aerosol Mass Spectrometer: detection limits and ionizer background effects.  
189 *Atmospheric measurement techniques*. 2009;2(1):33-46.
- 190 8. AG T. Specifications and Limits of Detection. 2023; [https://www.tofwerk.com/products/clearfab-](https://www.tofwerk.com/products/clearfab-amc/specifications/)  
191 [amc/specifications/](https://www.tofwerk.com/products/clearfab-amc/specifications/).
- 192 9. INC P. PICARRO G2401 GAS CONCENTRATION ANALYZER. 2023;  
193 [https://www.picarro.com/g2401\\_gas\\_concentration\\_analyzer](https://www.picarro.com/g2401_gas_concentration_analyzer).

194
